# Supplementary material
Source: Research Square preprint supplement (doi:10.21203/rs.3.rs-9600018/v1)
Supplement: Supplementary file 1 [file 3b4bd478141e417701e9c567.docx]

**Supplementary Materials**

**for**

**Neurofunctional mechanisms of action of a 4-week trigeminal nerve stimulation (TNS) in children and adolescents with Attention Deficit/Hyperactivity Disorder (ADHD)**

| **Supplementary Table S1**. **Details of the stimulation parameters and settings for the real and sham TNS devices** | | |
| --- | --- | --- |
|  | Real TNS | Sham TNS |
| Frequency of stimulation | 120 Hz | 2 Hz |
| Pulse width | 250 μs | 50 μs |
| Pulse interval | 8 ms | 8 ms |
| Maximum stimulus intensity | 8.4 mA | 10 mA |
| Minimum stimulus intensity | 0.5 mA | 0.4 mA |
| Average stimulus intensity | 2.18 mA | 4.25 mA |
| Net charge per pulse at maximum stimulus intensity | 2.5 μC | 2.5 μC |
| Maximum output voltage at maximum stimulus intensity | 5.36 V | 5.36 V |
| Current increment | 0.2 mA | 0.2 mA |
| Cycling | 30 sec on/30 sec off | 30 sec on/(1hr-30s) off |
| Hours of use | 8 hrs during sleep | 8 hrs during sleep |
| Stimulation time (8 hrs of use) | 240 min | 4 min |
| Number of pulses (8 hrs of use) | ~1.7 million | ~480 |
| **Note.** Hz=Hertz; μs=microsecond; ms=millisecond; mA=milliampere; μC=microcoulombs; V=volt; hr=hours; min=minutes; sec=seconds. | | |

| **Supplementary Table S2. Parent, child and researcher blinding guesses at week 1 and week 4** | | | | | | | |
| --- | --- | --- | --- | --- | --- | --- | --- |
| **Blinding guesses** | **Child** | | **Parent** | | **Researcher** | | |
| **Real TNS** | **Sham TNS** | **Real TNS** | **Sham TNS** | | **Real TNS** | **Sham TNS** |
| **Week 1 - guess, N (%)** | | | | | | | |
| Real TNS | 11 (36.7) | 9 (33.3) | 12 (40.0) | 7 (25.9) | 3 (10.0) | | 4 (14.8) |
| Sham TNS | 1 (3.3) | 5 (18.5) | 4 (13.3) | 5 (18.5) | 2 (6.7) | | 4 (14.8) |
| Don't know | 18 (60.0) | 13 (48.1) | 14 (46.7) | 15 (55.6) | 25 (83.3) | | 19 (70.0) |
| **Week 4 - guess, N (%)** | | | | | | | |
| Real TNS | 9 (30) | 6 (22.2) | 7 (23.3) | 6 (22.2) | 3 (10.0) | | 3 (11.1) |
| Sham TNS | 10 (33.3) | 8 (29.6) | 13 (43.3) | 10 (37.0) | 12 (40.0) | | 10 (37.0) |
| Don't know | 11 (46.7) | 15 (55.6) | 10 (33.3) | 11 (40.7) | 15 (50.0) | | 14 (50.9) |

*Stop Task*

To establish that the Stop task evoked significant brain activation in previously identified inhibition- and task-associated brain regions, one-sample *t*-tests of two contrasts: 1) successful inhibition (successful Stop signals, SS) relative to the baseline ‘Go condition (Go signals, GS), and 2) unsuccessful inhibition (failed Stop signals, FS) relative to the baseline ‘Go condition (Go signals, GS), were conducted in both groups. These are well established inhibition-related contrasts studied in the fMRI Stop task and thus have been chosen for this analysis 1-3. Cluster-based family-wise error (FWE) correction (*p* < 0.05) with a cluster-forming threshold of *p*uncorrected < 0.001 was applied to account for multiple comparisons.

| **Supplementary Table S3**. **Stop task: significant clusters of activation for pre and post real and sham TNS during the Successful Stop vs Go condition** | | | | | | | |
| --- | --- | --- | --- | --- | --- | --- | --- |
| **Cluster** | **Brain Region** | **Cluster Size (voxels)** | **Peak MNI Coordinate** | | | **Peak *z*** | **Cluster *pFWE*** |
| **x** | **y** | **z** |
| **Pre** | **Real TNS *–* Successful Stop vs Go** |  |  |  |  |  |  |
| 1 | R Inferior Parietal Cortex | 799 | 34 | -41 | 43 | 4.94 | <0.001 |
| 2 | L Superior Frontal Gyrus/Supplementary Motor Area | 266 | 19 | 0 | 66 | 5.06 | <0.001 |
| 3 | L Inferior Occipital Gyrus | 242 | -38 | -71 | 7 | 4.90 | <0.001 |
| 4 | R Anterior Insula/Inferior Frontal Gyrus | 205 | 30 | 22 | 0 | 4.97 | <0.001 |
| 5 | L Anterior Insula/Inferior Frontal Gyrus | 184 | -30 | 15 | -10 | 4.95 | 0.001 |
| 6 | L Superior Parietal Lobe/Precuneus | 157 | -26 | -52 | 49 | 5.41 | 0.002 |
| 7 | R Supplementary Motor Area | 111 | 8 | 15 | 45 | 4.28 | 0.008 |
| 8 | L Posterior Cingulate Cortex | 94 | -15 | -68 | 7 | 4.90 | 0.015 |
| 9 | R Posterior Cingulate Cortex | 71 | 15 | -68 | 7 | 3.89 | 0.039 |
| **Post** | **Real TNS – Successful Stop vs Go** |  |  |  |  |  |  |
| 1 | R Middle Temporal Gyrus | 436 | 45 | -60 | 3 | 5.52 | <0.001 |
| 2 | R Anterior Insula/Inferior Frontal Gyrus | 308 | 34 | 19 | 0 | 5.89 | <0.001 |
| 3 | L Anterior Insula/Inferior Frontal Gyrus | 134 | -30 | 19 | 7 | 4.80 | 0.007 |
| 4 | L Inferior Occipital Gyrus | 123 | -41 | -71 | 0 | 5.68 | 0.010 |
| 5 | L/R Supplementary Motor Area | 123 | 8 | 22 | 40 | 4.09 | 0.010 |
| **Pre** | **Sham TNS –Successful Stop vs Go** |  |  |  |  |  |  |
| 1 | R Lingual Gyrus/Posterior Cingulate Cortex | 492 | 22 | -52 | 0 | 4.94 | <0.001 |
| 2 | R Anterior Insula/Inferior Frontal Gyrus | 227 | 30 | 22 | -3 | 4.31 | 0.001 |
| 3 | L Lingual Gyrus/Posterior Cingulate Cortex | 150 | -22 | -56 | 0 | 4.63 | 0.008 |
| 4 | R Precentral Gyrus | 95 | 52 | 0 | 46 | 4.40 | 0.034 |
| 5 | L Inferior Occipital Gyrus | 89 | -45 | -68 | 3 | 4.42 | 0.041 |
| **Post** | **Sham TNS – Successful Stop vs Go** |  |  |  |  |  |  |
| 1 | R Inferior Occipital Gyrus/Posterior Cingulate Cortex | 196 | 49 | -68 | 0 | 4.55 | 0.001 |
| 2 | L Anterior Insula/Inferior Frontal Gyrus | 97 | -24 | 22 | 7 | 4.86 | 0.023 |
| 3 | L Middle Temporal Gyrus/Inferior Occipital Gyrus | 83 | -49 | -68 | 3 | 4.24 | 0.036 |

| **Supplementary Table S4**. **Stop task: significant clusters of activation for pre and post real and sham TNS during the Failed Stop vs Go condition** | | | | | | | |
| --- | --- | --- | --- | --- | --- | --- | --- |
| **Cluster** | **Cerebral Region** | **Cluster Size (voxels)** | **Peak MNI Coordinate** | | | **Peak *z*** | **Cluster *pFWE*** |
| **x** | **y** | **z** |
| **Pre** | **Real TNS – Failed Stop vs Go** |  |  |  |  |  |  |
| 1 | L Anterior Insula/ Inferior Frontal Gyrus/Thalamus | 879 | -34 | 15 | -3 | 5.59 | <0.0001 |
| 2 | R Middle/Inferior Temporal Gyrus | 452 | 52 | -45 | 10 | 4.99 | <0.0001 |
| 3 | L Middle Temporal Gyrus/Occipital cortex | 190 | -52 | -52 | 10 | 4.04 | 0.001 |
| **Post** | **Real TNS – Failed Stop vs Go** |  |  |  |  |  |  |
| 1 | R Middle Temporal Gyrus/Occipital cortex | 254 | 45 | -64 | 3 | 4.85 | <0.0001 |
| 2 | L Inferior Occipital Gyrus/Thalamus | 237 | -41 | -71 | -10 | 5.51 | <0.0001 |
| 3 | R Inferior Frontal Gyrus/Insula | 218 | 34 | 26 | -3 | 4.64 | <0.0001 |
| 4 | R Supplementary Motor Area | 145 | 8 | 4 | 63 | 4.11 | 0.003 |
| 5 | L Anterior Insula/Inferior Frontal Gyrus | 70 | -30 | 15 | 10 | 4.05 | 0.043 |
| **Pre** | **Sham TNS – Failed Stop vs Go** |  |  |  |  |  |  |
| 1 | R Inferior Temporal/Occipital Gyrus | 116 | 41 | -64 | 3 | 4.19 | 0.014 |
| 2 | R Anterior Insula/Inferior Frontal Gyrus | 114 | 38 | 26 | -3 | 4.21 | 0.015 |
| 3 | R Supplementary Motor Area | 112 | 11 | -4 | 66 | 4.15 | 0.016 |
| 4 | R Occipital Cortex | 102 | 22 | -44 | 7 | 3.99 | 0.022 |
| **Post** | **Sham TNS – Failed Stop vs Go** |  |  |  |  |  |  |
| 1 | R Anterior Insula/Inferior Frontal Gyrus | 123 | 38 | 19 | 0 | 4.54 | 0.007 |
| 2 | R Inferior Occipital Gyrus | 98 | 45 | -71 | 0 | 4.74 | 0.016 |
| 3 | R Middle Temporal/Occipital Gyrus | 71 | 45 | -22 | -7 | 4.80 | 0.044 |

*Working Memory Task (N-back)*

To establish that the Working memory task evoked significant brain activation in previously identified working memory-associated brain regions, a one-sample *t*-test of the contrast of high working memory load (2-back) relative to the baseline vigilance condition (0-back) was conducted in both groups. This is a well-established working memory contrast studied in the n-back task and thus has been chosen for this analysis 4,5. Cluster-based family-wise error (FWE) correction (*p* < 0.05) with a cluster-forming threshold of *p*uncorrected < 0.001 was applied to account for multiple comparisons.

| **Supplementary Table S5. Working memory task: significant clusters of activation for pre and post real and sham TNS during the 2-back vs 0-back condition** | | | | | | | |
| --- | --- | --- | --- | --- | --- | --- | --- |
| **Cluster** | **Cerebral Region** | **Cluster Size (voxels)** | **Peak MNI Coordinate** | | | **Peak *z*** | **Cluster *pFWE*** |
| **x** | **y** | **z** |
| **Pre** | **Real TNS – 2-back vs 0-back** |  |  |  |  |  |  |
| 1 | L/R Middle Frontal Gyrus/ Supplementary Motor Area/Precentral Gyrus/Inferior Frontal Gyrus/Insula | 2362 | 45 | 11 | 43 | 5.72 | <0.0001 |
| 2 | L/R Superior/Inferior Parietal Lobe/Precuneus | 1483 | 34 | -56 | 49 | 6.11 | <0.0001 |
| 3 | L/R Middle Frontal Gyrus/Inferior Frontal Gyrus/Insula | 110 | -30 | 60 | 0 | 4.56 | 0.017 |
| **Post** | **Real TNS - 2-back vs 0-back** |  |  |  |  |  |  |
| 1 | L/R Inferior Parietal Lobe/Precuneus | 1324 | 34 | -60 | 46 | 6.04 | <0.0001 |
| 2 | L/R Supplementary Motor Area/Precentral Gyrus | 747 | 4 | 19 | 49 | 5.02 | <0.0001 |
| 3 | L/R Middle Frontal Gyrus/Anterior Cingulate Cortex | 711 | 41 | 26 | 30 | 5.18 | <0.0001 |
| 4 | R Anterior Insula/Inferior Frontal Gyrus/Caudate | 133 | 30 | 22 | 0 | 4.97 | 0.006 |
| 5 | L Anterior Insula/Inferior Frontal Gyrus | 87 | -34 | 19 | 0 | 4.25 | 0.030 |
| **Pre** | **Sham TNS – 2-back vs 0-back** |  |  |  |  |  |  |
| 1 | R Superior Parietal Lobe | 707 | 38 | -45 | 36 | 5.97 | <0.0001 |
| 2 | R Middle Frontal Gyrus | 582 | 30 | 8 | 63 | 5.19 | <0.0001 |
| 3 | L Superior Parietal Lobe | 299 | -34 | -56 | 49 | 4.69 | <0.0001 |
| 4 | L Precentral Gyrus | 254 | -38 | -4 | 33 | 4.42 | <0.0001 |
| 5 | R Supplementary Motor Area | 106 | 8 | 19 | 49 | 4.21 | 0.013 |
| 6 | R Anterior Insula | 74 | 30 | 22 | 3 | 4.24 | 0.042 |
| **Post** | **Sham TNS – 2-back vs 0-back** |  |  |  |  |  |  |
| 1 | R Middle Frontal Gyrus | 861 | 30 | 4 | 59 | 5.52 | <0.0001 |
| 2 | R Inferior Parietal Lobe/Precuneus | 820 | 15 | -68 | 49 | 5.49 | <0.0001 |
| 3 | L Inferior Parietal Lobe /Precuneus | 529 | -34 | -52 | 49 | 5.58 | <0.0001 |
| 4 | L Inferior Frontal Gyrus/Precentral Gyrus | 399 | -49 | 8 | 33 | 5.46 | <0.0001 |
| 5 | R Anterior Cingulate Cortex/Supplementary Motor Area | 176 | 11 | 19 | 33 | 4.71 | 0.001 |
| 6 | L Cerebellum | 131 | -30 | -64 | -33 | 4.89 | 0.004 |

*Sustained Attention Task (SAT)*

To establish that the Sustained Attention Task evoked significant brain activation in previously identified sustained attention-associated brain regions, one-sample *t*-tests of the contrast of high sustained load (2s, 5s, 8s delays – long delays) relative to the baseline high somatosensory condition (0.5s delays – short delays) were conducted in both groups. These are well-established sustained attention contrasts studied in the SAT and thus have been chosen for this analysis 6-10. Cluster-based family-wise error (FWE) correction (*p* < 0.05) with a cluster-forming threshold of *p*uncorrected < 0.001 was applied to account for multiple comparisons.

| **Supplementary Table S6. Sustained Attention task: significant clusters of activation for pre and post real and sham TNS during the Long Delays > Short Delays condition** | | | | | | | |
| --- | --- | --- | --- | --- | --- | --- | --- |
| **Cluster** | **Cerebral Region** | **Cluster Size (voxels)** | **Peak MNI Coordinate** | | | **Peak *z*** | **Cluster *pFWE*** |
| **x** | **y** | **z** |
| **Pre** | **Real TNS – Long delays > Short delays** |  |  |  |  |  |  |
|  | L/R Cuneus/Occipital Cortex | 382 | 8 | -94 | 9 | 5.85 | <0.0001 |
| **Post** | **Real TNS – Long delays > Short delays** |  |  |  |  |  |  |
|  | L/R Cuneus/Occipital Cortex | 265 | 8 | -88 | 18 | 4.84 | <0.0001 |
| **Pre** | **Sham TNS – Long delays vs Short delays** |  |  |  |  |  |  |
|  | L/R Cuneus/Superior Occipital Gyrus | 116 | 15 | -84 | 27 | 4.09 | 0.004 |
| **Post** | **Sham TNS – Long delays vs Short delays** |  |  |  |  |  |  |
|  | No significant clusters |  |  |  |  |  |  |

**ROI Analyses**

| **Supplementary Table S7**. **Stop task**: **between-group ROI analyses of Successful Stop (SS) vs Go (GS) and Failed Stop (FS) v Go (GS) conditions** | | | | | | | | | | |
| --- | --- | --- | --- | --- | --- | --- | --- | --- | --- | --- |
|  | **Real TNS** | | **Sham TNS** | | **Mixed-measures ANOVA** | | | | | |
|  | Pre  N=23 | Post  N=23 | Pre  N=21 | Post  N=21 | Group | | Time | | Group x  Time | |
| ***SS vs GS*** | M(SD) | M(SD) | M (SD) | M (SD) | F₁,39 | p | F₁,39 | p | F₁,39 | p |
| left DLPFC | -0.08(1.98) | 0.14(1.52) | 0.19(2.01) | -0.43(1.58) | 0.35 | 0.557 | 0.99 | 0.326 | 0.74 | 0.394 |
| left IFG | 0.34(1.79) | 0.32(1.64) | 0.24(1.72) | 0.81(1.67) | 0.08 | 0.785 | 0.05 | 0.829 | 1.66 | 0.205 |
| right DLPFC | 0.70(1.69) | 0.57(2.40) | 0.89(2.14) | -0.07(1.88) | 0.34 | 0.566 | 3.77 | 0.059 | 0.57 | 0.455 |
| right IFG | 1.13(2.13) | 1.14(2.26) | 1.53(2.10) | 0.59(2.26) | 0.14 | 0.715 | 3.10 | 0.086 | 1.06 | 0.310 |
| ***FS vs GS*** | M(SD) | M(SD) | M (SD) | M (SD) | F₁,39 | p | F₁,39 | p | F₁,39 | p |
| left DLPFC | 0.23(1.30) | 0.17(1.65) | 0.04(1.28) | -0.34(1.23) | 1.42 | 0.240 | 0.34 | 0.562 | 0.27 | 0.610 |
| left IFG | 0.79(1.42) | 0.06(1.46) | 0.21(1.63) | 0.20(1.06) | 0.98 | 0.328 | 0.54 | 0.466 | 1.79 | 0.189 |
| right DLPFC | 0.57(1.47) | 0.52(1.68) | 0.38(1.39) | 0.11(1.38) | 1.16 | 0.289 | 0.20 | 0.658 | 0.21 | 0.652 |
| right IFG | 1.49(1.63) | 0.99(1.75) | 1.03(1.51) | 0.93(1.23) | 1.46 | 0.234 | 1.09 | 0.302 | 0.28 | 0.598 |

| **Supplementary Table S8. Working Memory N-back task: between-group ROI analyses of 2-back vs 0-back condition** | | | | | | | | | | |
| --- | --- | --- | --- | --- | --- | --- | --- | --- | --- | --- |
|  | **Real TNS** | | **Sham TNS** | | **Mixed-measures ANOVA** | | | | | |
|  | Pre  N=23 | Post  N=23 | Pre  N=21 | Post  N=21 | Group | | Time | | Group x  Time | |
|  | M(SD) | M(SD) | M (SD) | M (SD) | F₁,39 | p | F₁,39 | p | F₁,39 | p |
| left DLPFC | 0.28(0.44) | 0.16(0.39) | 0.17(0.45) | 0.18(0.32) | 0.24 | 0.625 | 0.42 | 0.523 | 0.72 | 0.402 |
| left IFG | 0.27(0.38) | 0.14(0.41) | 0.18(0.43) | 0.06(0.53) | 1.14 | 0.292 | 1.32 | 0.258 | 0.01 | 0.939 |
| right DLPFC | 0.40(0.47) | 0.27(0.36) | 0.38(0.44) | 0.36(0.29) | 0.18 | 0.685 | 0.48 | 0.491 | 0.52 | 0.476 |
| right IFG | 0.28(0.45) | 0.10(0.40) | 0.27(0.34) | 0.15(0.47) | 0.08 | 0.780 | 0.58 | 0.452 | 0.14 | 0.711 |

| **Supplementary Table S9. Sustained Attention Task: between-group ROI analyses of Long Delays > Short Delays condition** | | | | | | | | | | |
| --- | --- | --- | --- | --- | --- | --- | --- | --- | --- | --- |
|  | **Real TNS** | | **Sham TNS** | | **Mixed-measures ANOVA** | | | | | |
|  | Pre  N=23 | Post  N=23 | Pre  N=21 | Post  N=21 | Group | | Time | | Group x  Time | |
|  | M(SD) | M(SD) | M (SD) | M (SD) | F1,40 | p | F1,40 | p | F1,40 | p |
| left DLPFC | -0.63(0.94) | -0.69(1.26) | -0.62(1.62) | -0.45(1.94) | 0.01 | 0.947 | 0.26 | 0.610 | 0.24 | 0.629 |
| left IFG | -0.63(0.99) | -0.40(1.12) | -0.52(1.67) | -0.35(1.43) | 0.01 | 0.985 | 0.95 | 0.334 | 0.01 | 0.924 |
| right DLPFC | -0.90(0.93) | -1.17(1.34) | -0.99(1.71) | -0.54(2.06) | 0.20 | 0.656 | 0.10 | 0.756 | 2.15 | 0.151 |
| right IFG | -1.40(1.08) | -1.21(1.65) | -1.22(1.67) | -1.10(1.89) | 0.03 | 0.872 | 0.61 | 0.440 | 0.01 | 0.982 |

**References**

1. Rubia, K., Smith, A.B., Brammer, M.J. & Taylor, E. Right inferior prefrontal cortex mediates response inhibition while mesial prefrontal cortex is responsible for error detection. *Neuroimage* **20**, 351-358 (2003).

2. Rubia, K., Smith, A.B., Brammer, M.J., Toone, B. & Taylor, E. Abnormal brain activation during inhibition and error detection in medication-naive adolescents with ADHD. *American Journal of Psychiatry* **162**, 1067-1075 (2005).

3. Rubia, K., Smith, A.B., Taylor, E. & Brammer, M. Linear age‐correlated functional development of right inferior fronto‐striato‐cerebellar networks during response inhibition and anterior cingulate during error‐related processes. *Human Brain Mapping* **28**, 1163-1177 (2007).

4. Kowalczyk, O.S.*, et al.* Single-dose effects of methylphenidate and atomoxetine on functional connectivity during an n-back task in boys with ADHD. *Psychopharmacology* **240**, 2045-2060 (2023).

5. Chantiluke, K.*, et al.* Disorder-dissociated effects of fluoxetine on brain function of working memory in attention deficit hyperactivity disorder and autism spectrum disorder. *Psychological Medicine* **45**, 1195-1205 (2015).

6. Kowalczyk, O.S.*, et al.* Methylphenidate and atomoxetine normalise fronto-parietal underactivation during sustained attention in ADHD adolescents. *European Neuropsychopharmacology* **29**, 1102-1116 (2019).

7. Christakou, A.*, et al.* Disorder-specific functional abnormalities during sustained attention in youth with attention deficit hyperactivity disorder (ADHD) and with autism. *Molecular Psychiatry* **18**, 236-244 (2013).

8. Lim, L.*, et al.* Neurofunctional abnormalities during sustained attention in severe childhood abuse. *PloS One* **11**, e0165547 (2016).

9. Murphy, C.M.*, et al.* Abnormal functional activation and maturation of fronto-striato-temporal and cerebellar regions during sustained attention in autism spectrum disorder. *American Journal of Psychiatry* **171**, 1107-1116 (2014).

10. Norman, L.J.*, et al.* Shared and disorder-specific task-positive and default mode network dysfunctions during sustained attention in paediatric Attention-Deficit/Hyperactivity Disorder and obsessive/compulsive disorder. *NeuroImage: Clinical* **15**, 181-193 (2017).
